# Supplementary material for: Modeling molecular J and H aggregates using multiple-Davydov D2 ansatz
Source: Royal Society of Chemistry journal article supplement (doi:10.1039/d2cp00819j), 2022-01-01
Supplement: d2cp00819j1.pdf [file d2cp00819j1.pdf]

# Supplementary Material to the “Modeling Molecular J and H Aggregates using Multiple-Davydov D2 Ansatz”

Mantas Jakučionis<sup>1</sup>, Agnius Žukas<sup>1</sup>, Darius Abramavičius<sup>1</sup>

<sup>1</sup>Institute of Chemical Physics, Vilnius University, Sauletekio Ave. 9-III, LT-10222 Vilnius, Lithuania

## Absorption spectra of model J and H aggregate

In the following Figures we present absorption spectra of vibronic model J and H aggregates in an open and closed chain configuration, computed with an increasing depth,  $M$ , of the mD<sub>2</sub> Ansatz. Aggregate consists of 10 sites with 1 vibrational mode, of frequency  $\omega = 500 \text{ cm}^{-1}$ , per site. Mode Huang-Rhys factor is set to  $S = 1$ . We vary the nearest neighbor coupling  $J$  from  $0 \text{ cm}^{-1}$  to  $\pm 1000 \text{ cm}^{-1}$  with step size of  $\pm 250 \text{ cm}^{-1}$ . Vibrational mode thermal energy  $k_B T$  is changed from  $250 \text{ cm}^{-1}$  to  $1000 \text{ cm}^{-1}$  with step of  $250 \text{ cm}^{-1}$ .

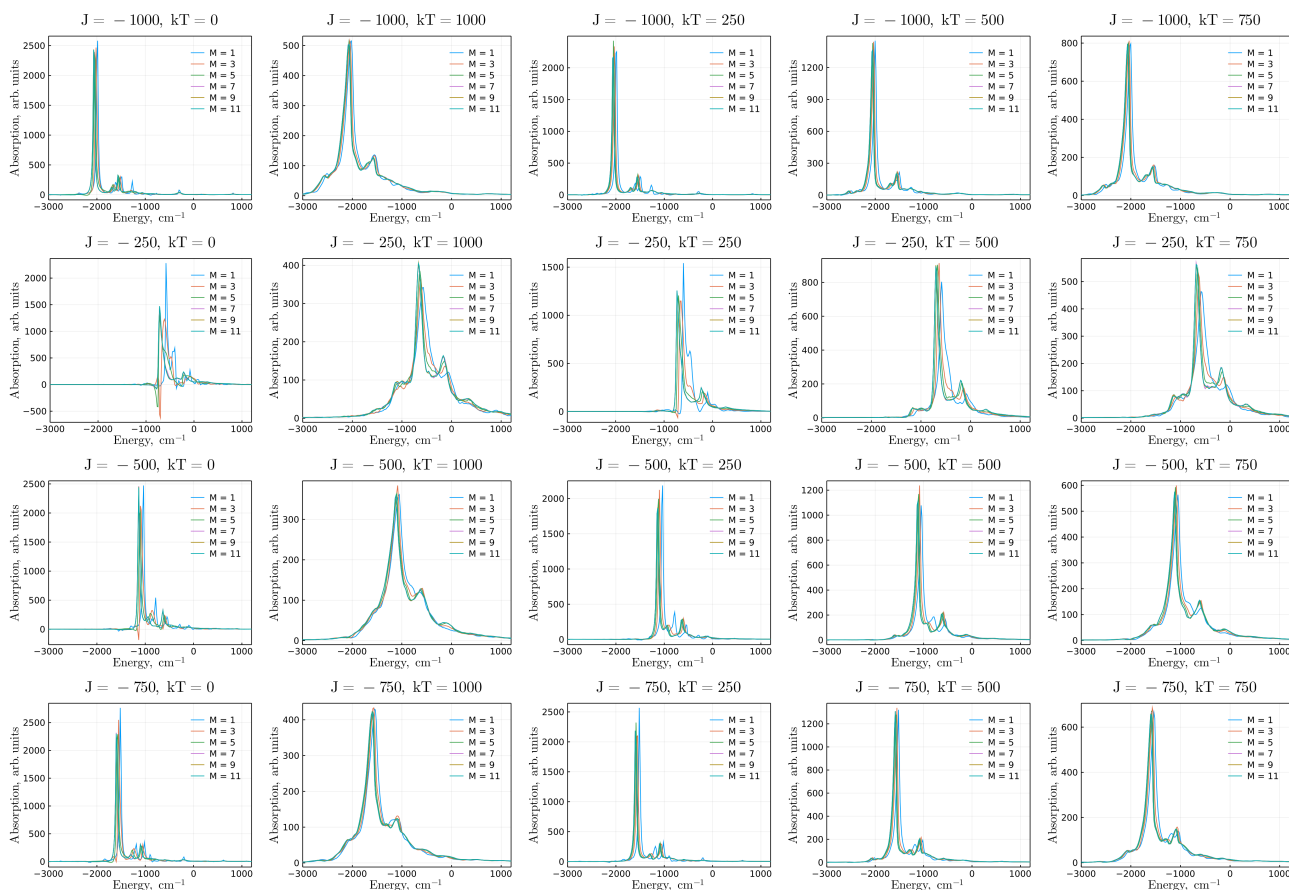

Figure 1. Absorption spectra of model J aggregate in an *open* chain configuration, computed with mD<sub>2</sub> Ansatz depth  $M$ , nearest neighbor coupling  $J$  and vibrational mode thermal energy  $k_B T$ .

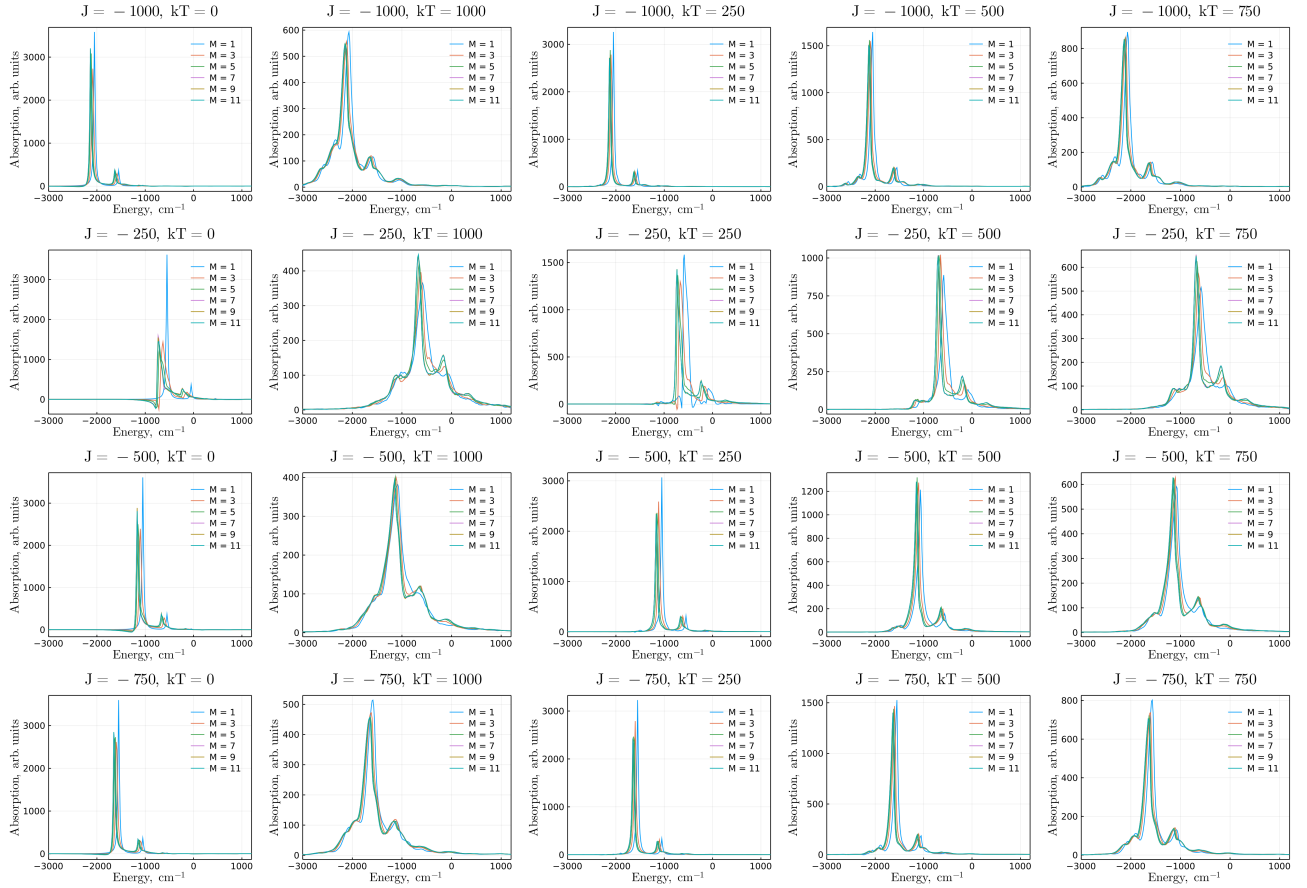

Figure 2. Absorption spectra of model J aggregate in a *closed* chain configuration, computed with mD<sub>2</sub> Ansatz depth  $M$ , nearest neighbor coupling  $J$  and vibrational mode thermal energy  $k_B T$ .

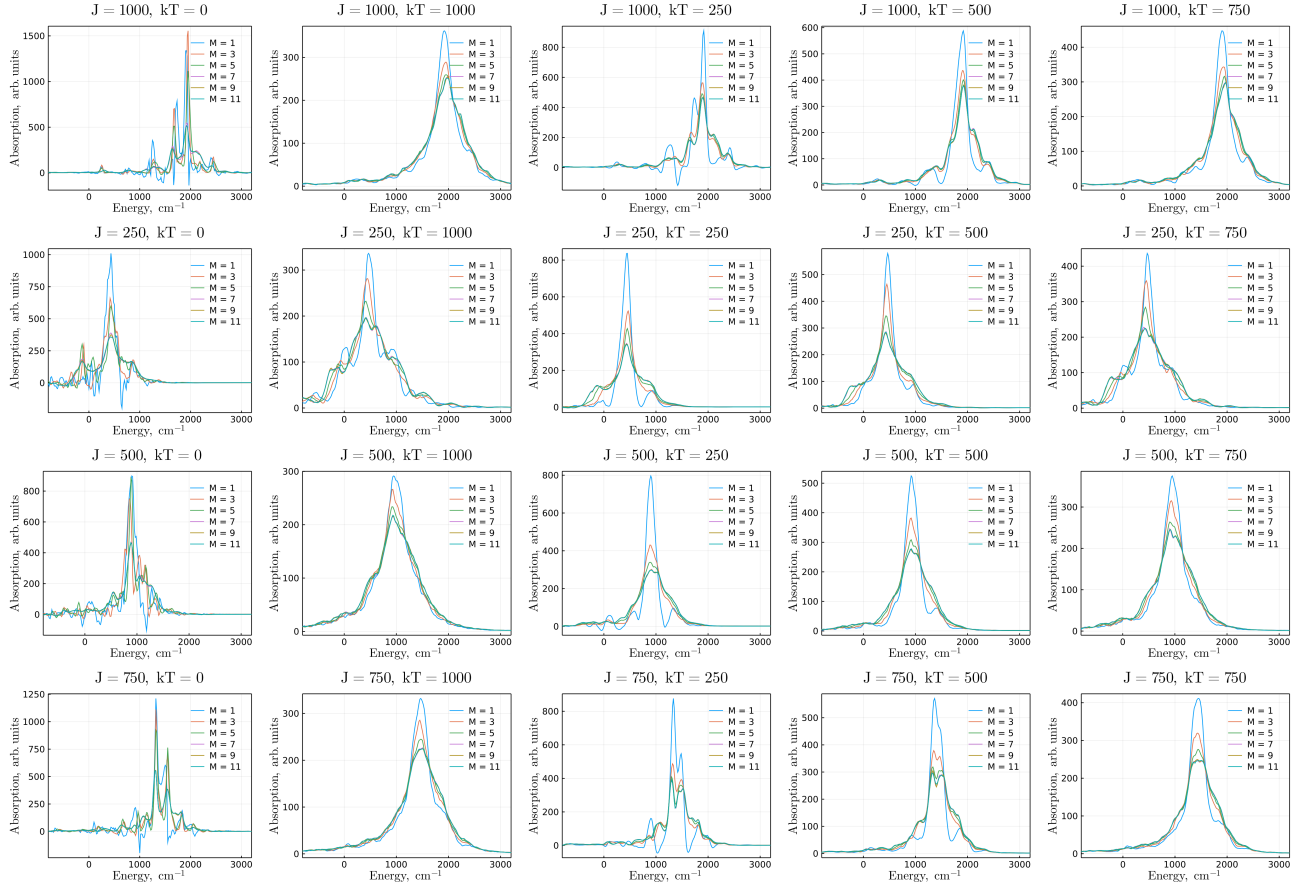

Figure 3. Absorption spectra of model H aggregate in an *open* chain configuration, computed with  $mD_2$  Ansatz depth  $M$ , nearest neighbor coupling  $J$  and vibrational mode thermal energy  $k_B T$ .

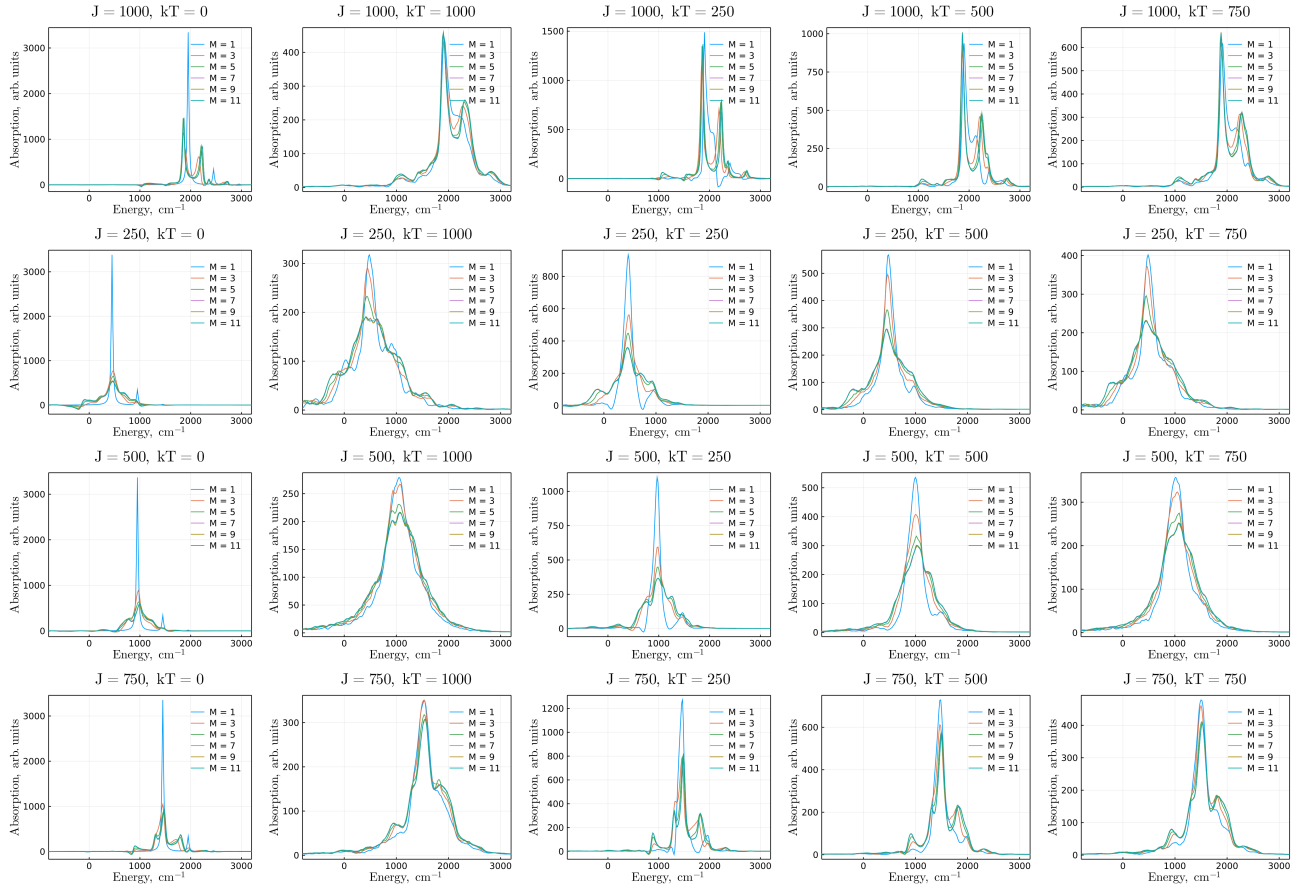

Figure 4. Absorption spectra of model H aggregate in a *closed* chain configuration, computed with mD<sub>2</sub> Ansatz depth  $M$ , nearest neighbor coupling  $J$  and vibrational mode thermal energy  $k_B T$ .
